# Supplementary material for: Graphene oxide embedded sandwich nanostructures for enhanced Raman readout and their applications in pesticide monitoring
Source: Royal Society of Chemistry journal article supplement (doi:10.1039/c3nr00631j), 2013-01-01
Supplement: c3nr00631j.pdf [file c3nr00631j.pdf]

**Electronic Supplementary Information**  
**Graphene Oxide Embedded Sandwich Nanostructures for Enhanced Raman Readout**  
**and Their Applications in Pesticides Monitoring**

Lulu Zhang<sup>a,b</sup>, Changlong Jiang<sup>b\*</sup>, and Zhongping Zhang<sup>a,b\*</sup>

<sup>a</sup> *Department of Chemistry, University of Science & Technology of China, Hefei, Anhui, 230026, China.*

<sup>b</sup> *Institute of Intelligent Machines, Chinese Academy of Sciences, Hefei, Anhui, 230031, China. E-mail: cljiang@iim.ac.cn; zpzhang@iim.ac.cn*

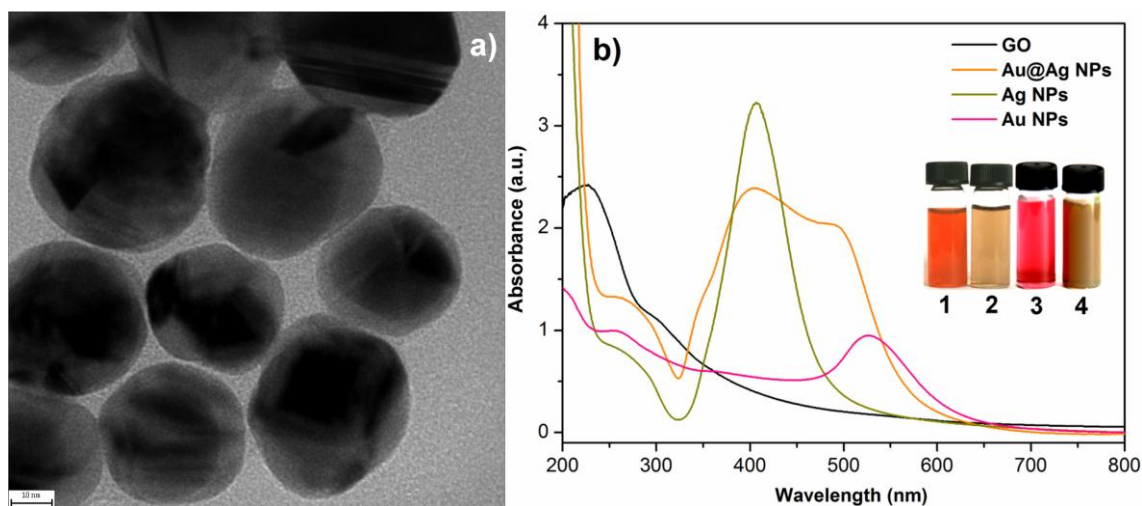

**Figure S1.** a) TEM image of the synthesized Au@Ag NPs. The scale bar is 10 nm. b) UV-Vis absorption spectra of the synthesized Au@Ag NPs, GO, Au NPs and Ag NPs dispersed in water. The inset is the photograph of the synthesized Au@Ag NPs (1), GO (2), Au NPs (3) and Ag NPs (4) dispersed in water.

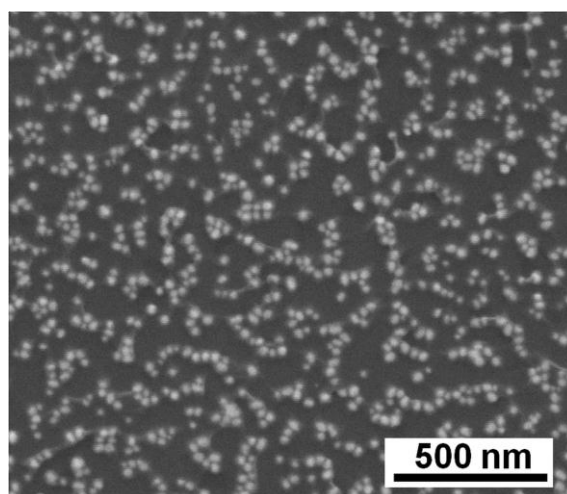

**Figure S2.** Enlarged SEM image of GO coated Au@Ag NPs film.

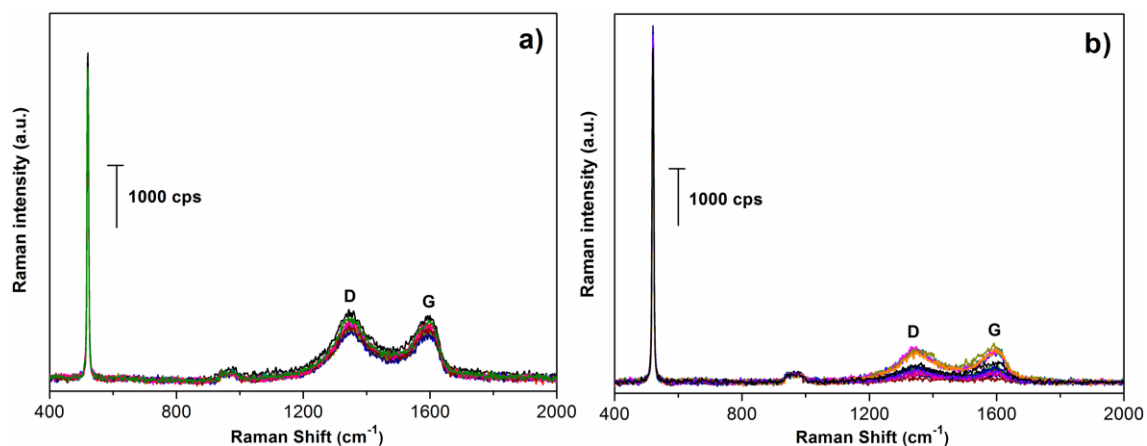

**Figure S3.** a) Raman signals of GO on the PEI modified Au@Ag NPs film collected from 10 random spots. b) Raman signals of GO on the non-PEI modified Au@Ag NPs film collected from 10 random spots.

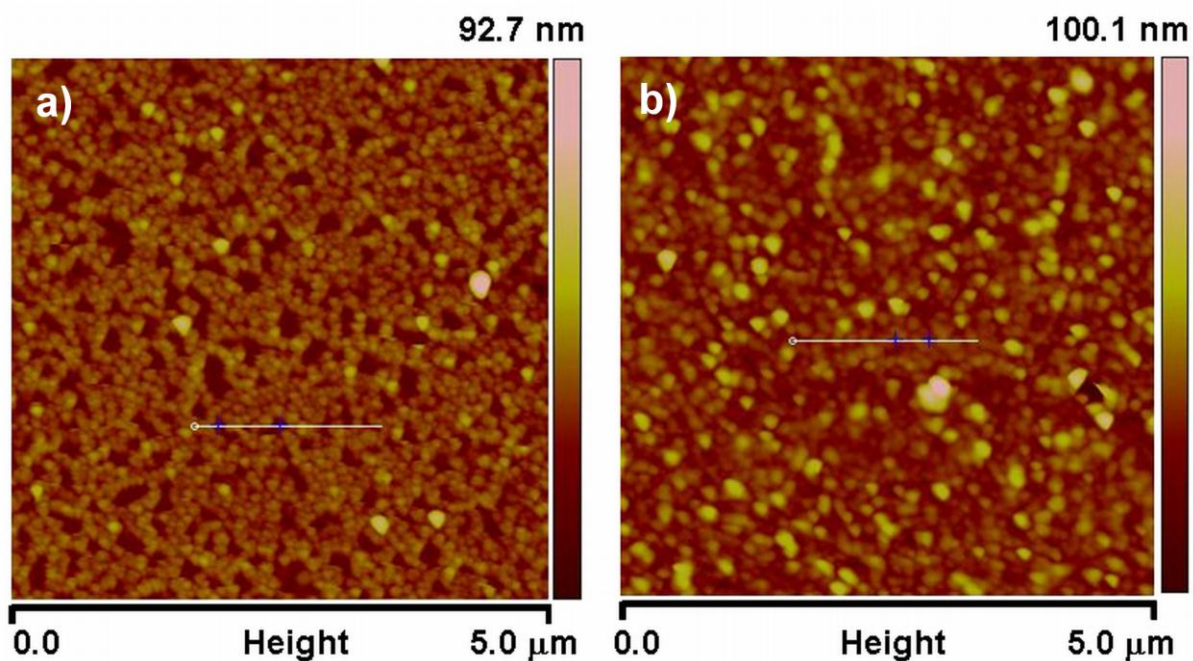

**Figure S4.** The typical AFM images of a) assembled Au@Ag NPs film, b) GO coated Au@Ag NPs film.

**Table S1.** Measured Average Zeta-Potential of GO and Au@Ag NPs.

|                     | GO    | Au@Ag NPs |
|---------------------|-------|-----------|
| Zeta-Potential (mV) | -35.2 | -53.4     |

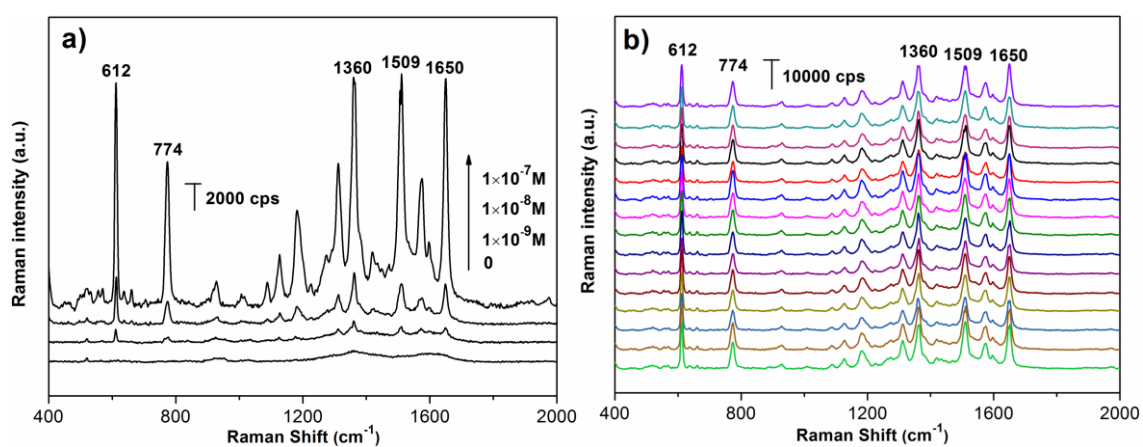

**Figure S5.** a) SERS spectra of different concentrations of R6G dispersed on the prepared substrate. b) SERS spectra recorded from 15 random spots for  $10^{-7}$  M R6G on the substrate.

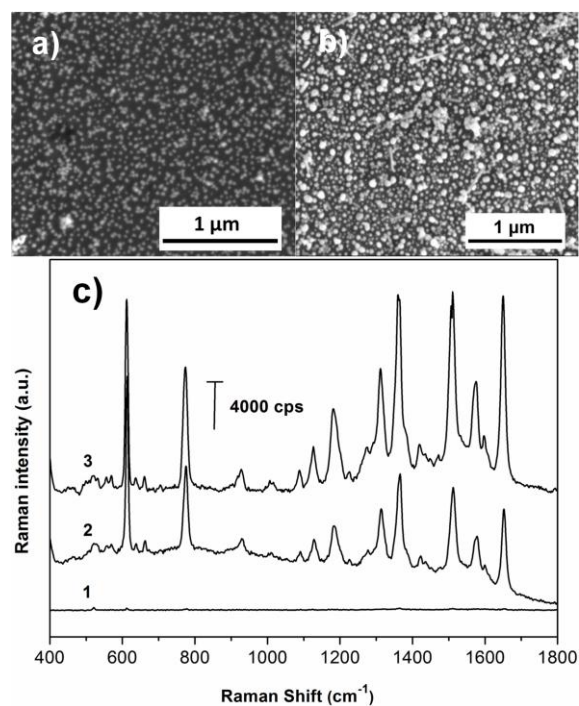

**Figure S6.** SEM images of a) assembled Au NPs/GO/Au NPs and b) Ag NPs/GO/Ag NPs sandwich structure. (c) SERS spectra of 10<sup>-7</sup> M R6G in ethanol on Au NPs/GO/Au NPs (curve 1), Ag NPs/GO/Ag NPs (curve 2), and Au@Ag NPs/GO/Au@Ag NPs (curve 3).

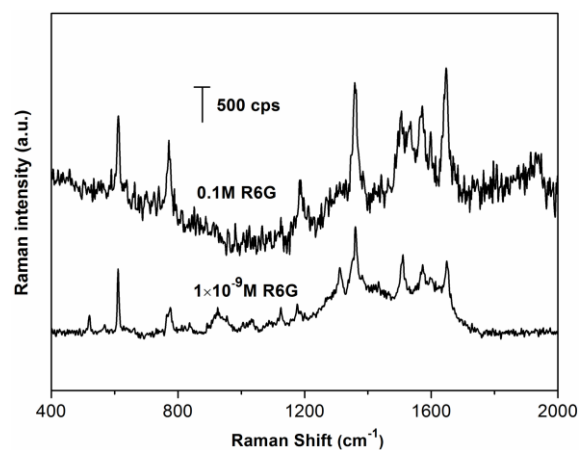

**Figure S7.** Raman spectra of 0.1 and 1 × 10<sup>-9</sup> M rhodamine-6G (R6G) on a silicon substrate (upper) and on the Au@Ag NPs/GO/Au@Ag NPs film (bottom), respectively.

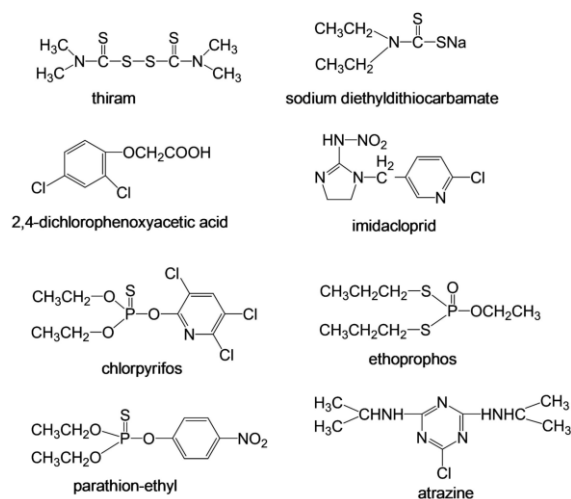

**Figure S8.** The chemical structures of the agricultural chemical compounds used for the selectivity study.

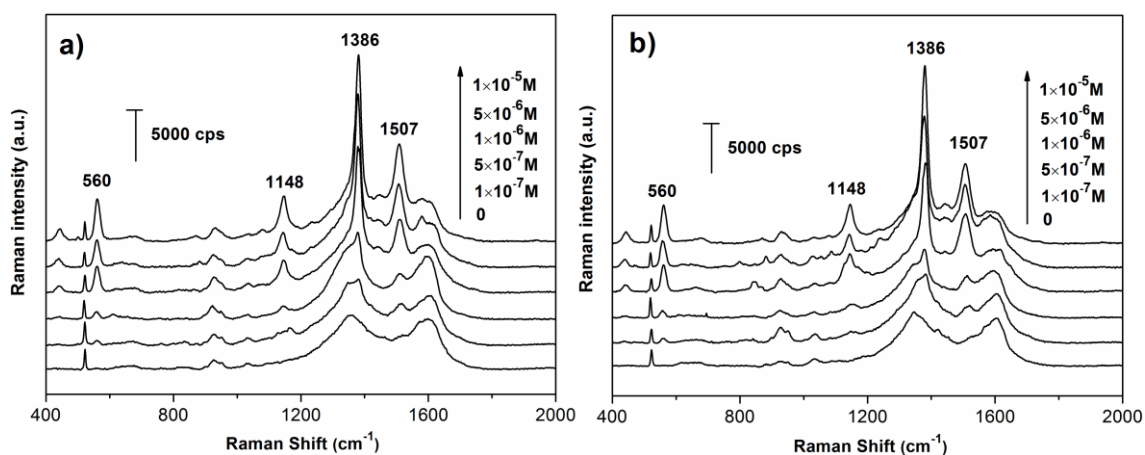

**Figure S9.** SERS spectra of thiram in ultrapure water a), real lake water b) at different spiked concentrations, respectively.
